# Supplementary material for: Natural resorcylic lactones derived from alternariol
Source: publisher site journal article supplement (doi:10.3762/bjoc.20.187), 2024-08-30
Supplement: Additional file 1 [file 1860-5397-20-187-S1.pdf]

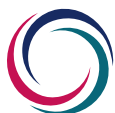

## Supporting Information

for

### Natural resorcylic lactones derived from alternariol

Joachim Podlech

*Beilstein J. Org. Chem.* **2024**, *20*, 2171–2207. [doi:10.3762/bjoc.20.187](https://doi.org/10.3762/bjoc.20.187)

### Attempted synthesis of 38 and calculated ECD spectrum of 70

- 1. Attempted synthesis of a natural product 38 and comparison of NMR-spectroscopic data**
- 2. Calculated ECD spectrum of hyalodendriol A (70)**

## 1. Attempted synthesis of a natural product **38** and comparison of NMR-spectroscopic data

The total synthesis of the proposed structure of **38** (see Figure 11 in the publication) was finalized via the following the sequence given in the scheme.<sup>1</sup> NMR spectroscopic analysis of the thus obtained compound **SI-3** furnished NMR data, which do not agree with those published with the isolation of the natural product **38**.<sup>2</sup> The proposed structure of **38** is thus very likely not correct.

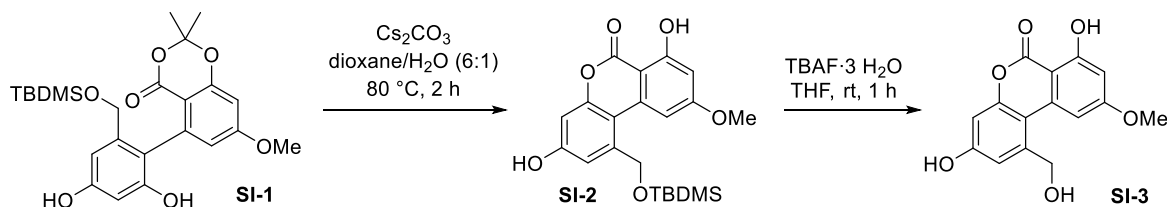

### 1-(*tert*-Butyldimethylsilyloxymethyl)-3,7-dihydroxy-9-methoxy-6*H*-benzo[*c*]chromen-6-one (**SI-2**):

Precursor **SI-1** (165 mg, 358  $\mu\text{mol}$ ) and  $\text{Cs}_2\text{CO}_3$  (500 mg, 1.53 mmol) in dioxane/ $\text{H}_2\text{O}$  (6:1; 6 mL) were stirred for 2 h at 80 °C and cooled to rt. Saturated aqueous  $\text{NH}_4\text{Cl}$  solution was added and the mixture was extracted with EtOAc (3 $\times$ ). The combined organic layers were dried ( $\text{Na}_2\text{SO}_4$ ), concentrated at reduced pressure, and purified by column chromatography (silica gel,  $\text{CH}_2\text{Cl}_2/\text{MeOH}$ , 100:2) to yield **SI-2** as an off-white solid (50 mg, 124  $\mu\text{mol}$ , 35%).  $R_f = 0.50$  (hexane/EtOAc, 2:1);  $^1\text{H}$  NMR (400 MHz,  $\text{DMSO}-d_6$ ):  $\delta$  (ppm) = 11.75 (s, 1 H, OH), 10.58 (s, 1 H, OH), 7.24 (d,  $^4J = 2.2$  Hz, 1 H, ArH), 7.02 (d,  $^4J = 2.7$  Hz, 1 H, ArH), 6.71 (d,  $^4J = 2.7$  Hz, 1 H, ArH), 6.61 (d,  $^4J = 2.1$  Hz, 1 H, ArH), 4.98 (s, 2 H,  $\text{CH}_2$ ), 3.89 (s, 3 H,  $\text{OCH}_3$ ), 0.89 [s, 9 H,  $\text{C}(\text{CH}_3)_3$ ], 0.12 (s, 6 H,  $2 \times \text{SiCH}_3$ );  $^{13}\text{C}$  NMR (101 MHz,  $\text{DMSO}-d_6$ ):  $\delta$  (ppm) = 166.4 (C), 164.6 (C), 164.0 (C), 159.0 (C), 152.5 (C), 140.5 (C), 136.6 (C), 115.2 (CH), 108.6 (C), 104.0 (CH), 102.8 (CH), 99.5 (CH), 98.5 (C), 64.6 ( $\text{CH}_2$ ), 55.8 ( $\text{OCH}_3$ ), 25.8 ( $3 \times \text{CH}_3$ ), 18.0 (C),  $-5.1$  ( $2 \times \text{SiCH}_3$ ); IR (ATR):  $\tilde{\nu}$  ( $\text{cm}^{-1}$ ) = 3501 (vw), 2930 (w), 2854 (w), 1650 (m), 1585 (m), 1463 (m), 1388 (w), 1353 (m), 1249 (m), 1225 (m), 1202 (m), 1191 (m), 1047 (m), 998 (m), 983 (m), 885 (w), 832 (s), 795 (m), 777 (m), 741 (m), 690 (m), 638 (m), 621 (m); MS (ASAP):  $m/z$  (%) = 549.3 (35), 403.2 (100)  $[\text{M}+1]^+$ , 271.1 (3)  $[\text{M}-\text{C}_6\text{H}_{15}\text{OSi}]^+$ ; HRMS:  $m/z$   $[\text{M}]^+$  calcd. for  $\text{C}_{21}\text{H}_{27}\text{O}_6^{28}\text{Si}$ : 403.1571; found: 403.1565.

### 3,7-Dihydroxy-1-(hydroxymethyl)-9-methoxy-6*H*-benzo[*c*]chromen-6-one (**SI-3**):

Precursor **SI-1** (50 mg, 109  $\mu\text{mol}$ ) and  $\text{Cs}_2\text{CO}_3$  (200 mg, 614  $\mu\text{mol}$ ) in dioxane/ $\text{H}_2\text{O}$  (6:1; 2 mL) were stirred for 2 h at 80 °C and cooled to rt. Saturated aqueous  $\text{NH}_4\text{Cl}$  solution was added and the mixture was extracted with EtOAc (3 $\times$ ). The combined organic layers were dried ( $\text{Na}_2\text{SO}_4$ ) and concentrated at reduced pressure to yield a crude product (40 mg), which was used without purification. It was dissolved in THF (5 mL),  $\text{Bu}_4\text{NF} \cdot 3\text{H}_2\text{O}$ -Lösung (1M in THF, 2 mL, 2.00 mmol) was added and the mixture was stirred for 1 h. Saturated aqueous  $\text{NH}_4\text{Cl}$  solution (20 mL) was added, stirring was continued for 10 min and the mixture

<sup>1</sup> Herzog, S.; Podlech, J., unpublished work; Herzog, S., Totalsynthese eine neuen Resorcylsäurelactons. Master Thesis, Karlsruher Institut für Technologie (KIT), Karlsruhe, 2019.

<sup>2</sup> Zhang, J.-c.; Chen, G.-Y.; Li, X.-Z.; Hu, M.; Wang, B.-Y.; Ruan, B.-H.; Zhou, H.; Zhao, L.-X.; Zhou, J.; Ding, Z.-T.; Yang, Y.-B., *Nat. Prod. Res.* **2017**, *31*, 2745-2752, doi: 10.1080/14786419.2017.1295235.

was extracted with EtOAc (3×). The combined organic layers were dried (Na<sub>2</sub>SO<sub>4</sub>), concentrated at reduced pressure, and purified by column chromatography (silica gel, CH<sub>2</sub>Cl<sub>2</sub>/MeOH, 100:2) to yield **SI-3** as a white solid (8 mg, 28 μmol, 26%). <sup>1</sup>H NMR and <sup>13</sup>C NMR: see table; IR (ATR):  $\tilde{\nu}$  (cm<sup>-1</sup>) = 3211 (w), 1651 (m), 1613 (m), 1567 (m), 1449 (w), 1422 (w), 1355 (w), 1281 (w), 1224 (m), 1197 (m), 1161 (m), 1092 (m), 979 (m), 835 (w), 782 (w), 734 (w), 692 (w), 628 (m), 570 (w), 526 (w); MS (ASAP): *m/z* (%) = 289.1 (100) [M+1]<sup>+</sup>; HRMS: *m/z* [M]<sup>+</sup> calcd. for C<sub>15</sub>H<sub>13</sub>O<sub>6</sub>: 289.0707; found: 289.0702.

| Natural product ( <b>38</b> ) <sup>2</sup>             | Synthesized compound ( <b>SI-3</b> )                   |
|--------------------------------------------------------|--------------------------------------------------------|
| <sup>13</sup> C NMR (100 MHz, acetone-d <sub>6</sub> ) | <sup>13</sup> C NMR (101 MHz, acetone-d <sub>6</sub> ) |
| 56.9 (9-OMe)                                           | 56.2 (9-OMe)                                           |
| 70.7 (1-CH <sub>2</sub> )                              | 64.6 (1-CH <sub>2</sub> )                              |
| 102.2 (C-8)                                            | 99.9 (C-6a)                                            |
| 108.3 (C-6a)                                           | 100.4 (C-8)                                            |
| 109.2 (C-10)                                           | 103.7 (C-4)                                            |
| 116.7 (C-2)                                            | 105.1 (C-10)                                           |
| 117.7 (C-4)                                            | 110.7 (C-10b)                                          |
| 128.5 (C-10a)                                          | 116.6 (C-2)                                            |
| 132.8 (C-10b)                                          | 138.1 (C-10a)                                          |
| 143.2 (C-1)                                            | 142.7 (C-1)                                            |
| 147.6 (C-4a)                                           | 154.0 (C-4a)                                           |
| 148.2 (C-3)                                            | 159.8 (C-3)                                            |
| 165.0 (C-7)                                            | 165.6 (C-7)                                            |
| 165.6 (C-9)                                            | 166.0 (C-6)                                            |
| 174.3 (C-6)                                            | 167.9 (C-9)                                            |
| <sup>1</sup> H NMR (400 MHz, acetone-d <sub>6</sub> )  | <sup>1</sup> H NMR (400 MHz, acetone-d <sub>6</sub> )  |
| 3.96 (s, 3 H, 9-OMe)                                   | 3.96 (s, 3 H, 9-OMe)                                   |
| 5.13, 4.95 (br s, 2 H, 1-CH <sub>2</sub> )             | 4.98 (d, 2 H, 1-CH <sub>2</sub> )                      |
| 6.58 (d, <i>J</i> = 1.6 Hz, 1 H, 8-H)                  | 6.56 (d, 1 H, 8-H)                                     |
| 6.65 (d, <i>J</i> = 2.0 Hz, 1 H, 10-H)                 | 6.77 (d, 1 H, 4-H)                                     |
| 7.07 (s, 1 H, 2-H)                                     | 7.14 (d, 1 H, 2-H)                                     |
| 7.16 (s, 1 H, 4-H)                                     | 7.53 (d, 1 H, 10-H)                                    |

## 2. Calculated ECD spectrum of hyalodendriol A (70)

Details on how this calculation was performed are given in a recent publication.<sup>3</sup> Six conformations with the lowest relative energies (all less than 10 kJ/mol) were considered and their ECD spectra were superimposed with Boltzmann weighting factors. The structure with the absolute configuration depicted in Figure 18 of the publication was used for calculation. Maxima and minima of the experimental ECD spectrum are included; a more meaningful and better comparable experimental full spectrum is given in the original publication.<sup>4</sup>

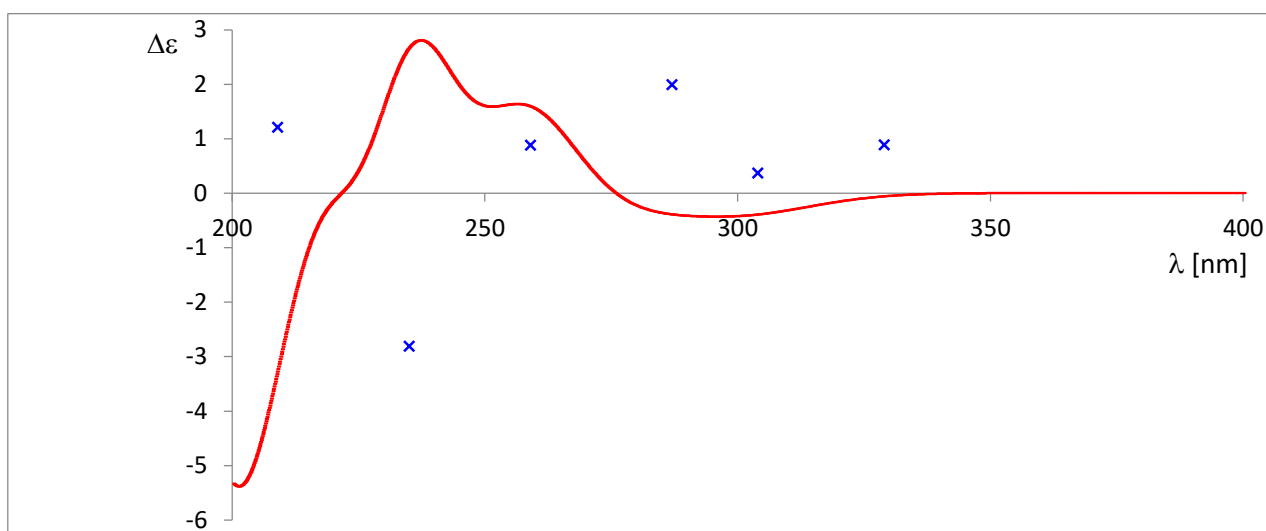

<sup>3</sup> Podlech, J.; Gutsche, M., *J. Nat. Prod.* **2023**, 86, 1632-1640, doi: 10.1021/acs.jnatprod.3c00078.

<sup>4</sup> Mao, Z.; Lai, D.; Liu, X.; Fu, X.; Meng, J.; Wang, A.; Wang, X.; Sun, W.; Liu, Z. L.; Zhou, L.; Liu, Y., *Pest Manage. Sci.* **2017**, 73, 1478-1485, doi: 10.1002/ps.4481.
